# Supplementary material
Source: PubMed Central journal article supplement (PMC4486045)
Supplement: NIHMS698699-supplement-1.pdf [file NIHMS698699-supplement-1.pdf]

ADP-ribosylated proteome, i.e.  
covalently conjugated substrates  
validated through site identification

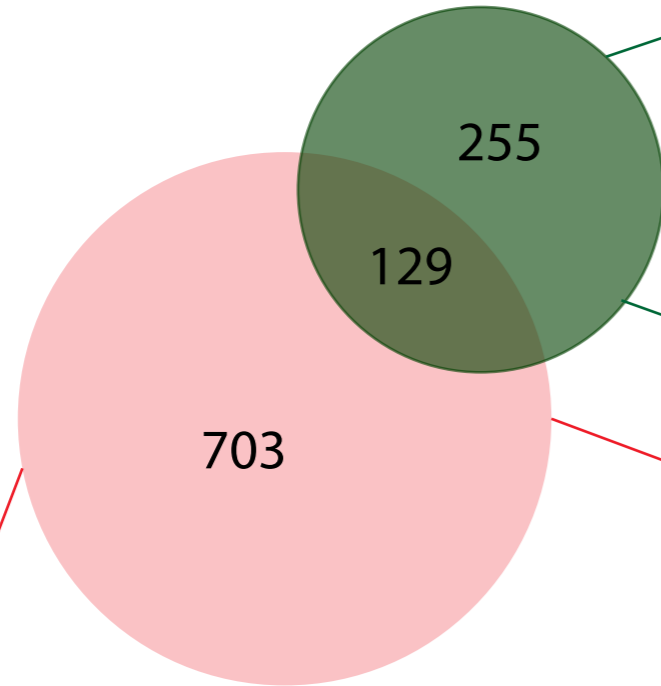

ADP-ribosylated Interactome  
(16% overlap with ADP-ribosylated proteome)

Ong and Leung et al 2014  
no knockdown

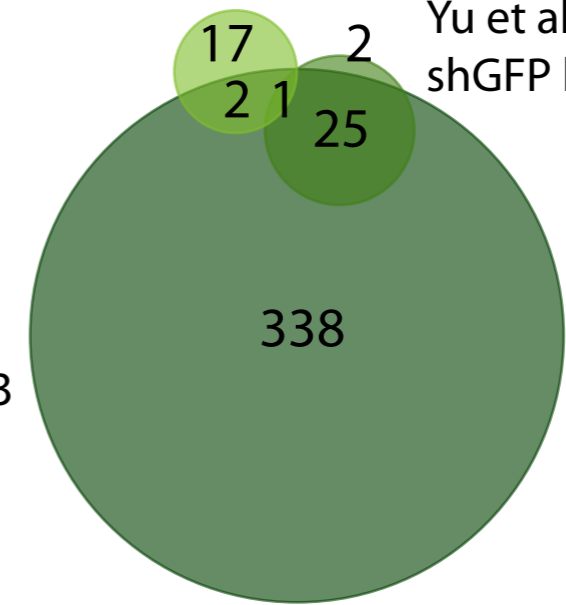

Yu et al 2013  
shGFP knockdown

Yu et al 2013  
shPARG  
knockdown

Poirier et al 2012  
Af1521 macrodomain enriched  
120 mM NaCl, 0.3% CHAPS, PARGi  
(33% overlap with ADP-ribosylated proteome)

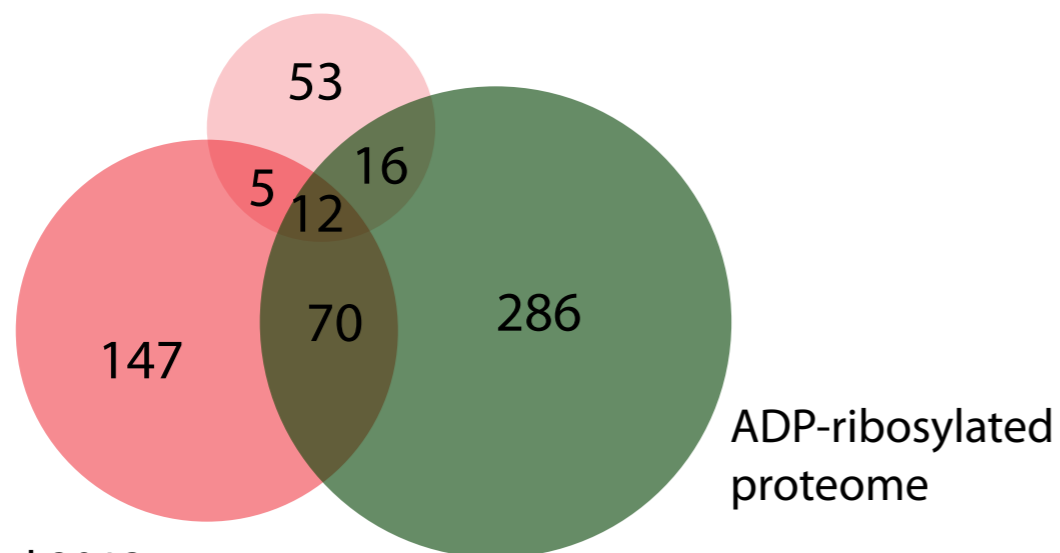

Nielsen et al 2013  
Af1521 macrodomain enriched  
400 --> 150 mM NaCl, 1 --> 0.5% NP-40, 0.1 --> 0.05% DOC  
PARGi, PARPi  
(35% overlap with ADP-ribosylated proteome)

Poirier et al 2012  
10H antibody enriched  
120 mM NaCl, 0.3% CHAPS, PARGi  
(13% overlap with ADP-ribosylated proteome)

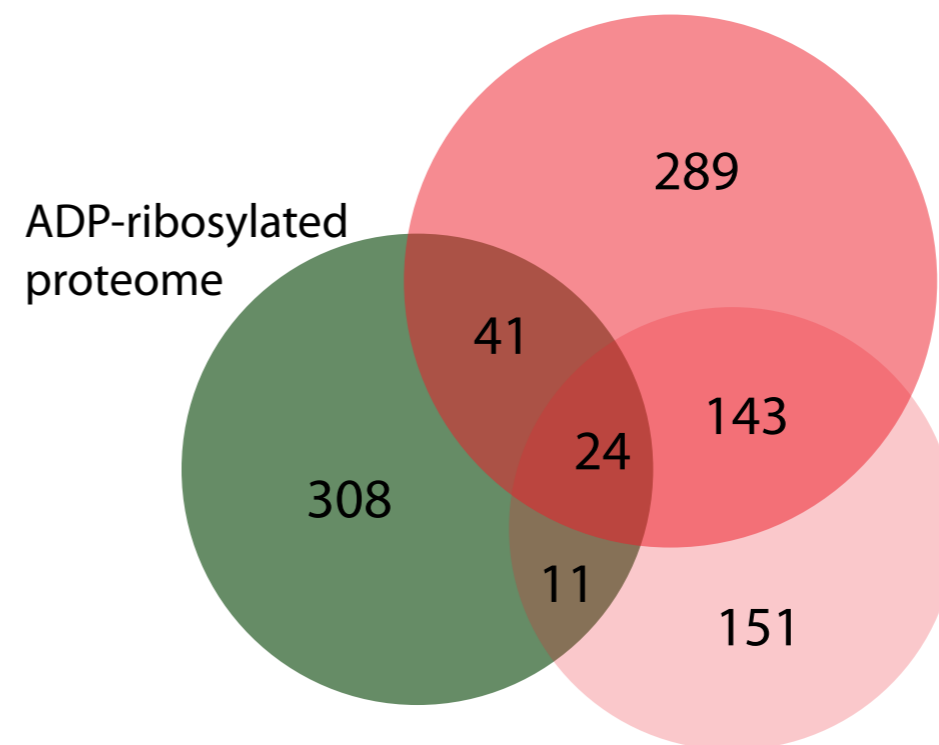

Poirier et al 2008  
10H antibody enriched  
2M --> 150 mM NaCl, 0.5% NP-40, PARGkd  
(11% overlap with ADP-ribosylated proteome)
