# Supplementary material
Source: PubMed Central journal article supplement (PMC4486045)
Supplement: NIHMS698699-supplement-3.pdf [file NIHMS698699-supplement-3.pdf]

| PARP | Genome Maintenance       | Transcription              | Translation and mRNA stability | Cell cycle                | Cell death              | Cell structure and motility | Transport               | Metabolism            | Cell signaling             |
|------|--------------------------|----------------------------|--------------------------------|---------------------------|-------------------------|-----------------------------|-------------------------|-----------------------|----------------------------|
| 1    | (de Murcia et al., 1997) | (Kraus and Hottiger, 2013) |                                | (Saxena et al., 2002)     | (Hong et al., 2004)     |                             |                         | (Bai and Canto, 2012) | (Andreone et al., 2003)    |
| 2    | (Ame et al., 1999)       | (Szanto et al., 2012)      |                                | (Liang et al., 2013)      | (Li et al., 2010)       |                             |                         | (Bai and Canto, 2012) | (Wyrsh et al., 2012)       |
| 3    | (Boehler et al., 2011)   | (Rouleau et al., 2011)     |                                | (Augustin et al., 2003)   |                         |                             |                         |                       |                            |
| 4    |                          |                            |                                | (Kickhoefer et al., 1999) |                         |                             | (van Zon et al., 2003)  |                       |                            |
| 5a   | (Smith et al., 1998)     |                            | (Leung et al., 2011)           | (Chang et al., 2005)      | (Bae et al., 2003)      |                             | (Yeh et al., 2007)      |                       | (Huang et al., 2009)       |
| 5b   | (Cook et al., 2002)      |                            |                                |                           | (Kaminker et al., 2001) |                             |                         |                       | (Huang et al., 2009)       |
| 6    |                          |                            |                                | (Tuncel et al., 2012)     |                         |                             |                         |                       |                            |
| 7    |                          | (MacPherson et al., 2013)  |                                | (Roper et al., 2014)      |                         |                             |                         |                       |                            |
| 8    |                          |                            |                                |                           |                         |                             |                         |                       |                            |
| 9    | (Yan et al., 2013)       | (Aguiar et al., 2005)      |                                |                           |                         |                             |                         |                       | (Juszczynski et al., 2006) |
| 10   | (Nicolae et al., 2014)   | (Yu et al., 2005)          |                                | (Chou et al., 2006)       | (Herzog et al., 2013)   |                             |                         |                       | (Verheugd et al., 2013)    |
| 11   |                          |                            |                                |                           |                         | (Meyer-Ficca et al., 2015)  |                         |                       |                            |
| 12   |                          |                            | (Welsby et al., 2014)          |                           |                         |                             |                         |                       | (Atasheva et al., 2014)    |
| 13   |                          |                            | (Leung et al., 2011)           |                           |                         |                             |                         |                       | (Hayakawa et al., 2011)    |
| 14   | (Nicolae et al., 2015)   | (Mehrotra et al., 2011)    | (Iqbal et al., 2014)           |                           |                         | (Vyas et al., 2013)         |                         | (Cho et al., 2011)    | (Goenka and Boothby, 2006) |
| 15   |                          | (Aguiar et al., 2005)      | (Leung et al., 2011)           |                           |                         |                             |                         |                       |                            |
| 16   |                          |                            |                                |                           |                         |                             | (Di Paola et al., 2012) |                       | (Jwa and Chang, 2012)      |

### References for supporting examples of PARP functions:

- Aguiar, R.C., Takeyama, K., He, C., Kreinbrink, K., and Shipp, M.A. (2005). B-aggressive lymphoma family proteins have unique domains that modulate transcription and exhibit poly(ADP-ribose) polymerase activity. *The Journal of biological chemistry* *280*, 33756-33765.
- Ame, J.C., Rolli, V., Schreiber, V., Niedergang, C., Apiou, F., Decker, P., Muller, S., Hoger, T., Menissier-de Murcia, J., and de Murcia, G. (1999). PARP-2, A novel mammalian DNA damage-dependent poly(ADP-ribose) polymerase. *J Biol Chem* *274*, 17860-17868.
- Andreone, T.L., O'Connor, M., Denenberg, A., Hake, P.W., and Zingarelli, B. (2003). Poly(ADP-ribose) polymerase-1 regulates activation of activator protein-1 in murine fibroblasts. *Journal of immunology* *170*, 2113-2120.
- Atasheva, S., Frolova, E.I., and Frolov, I. (2014). Interferon-stimulated poly(ADP-Ribose) polymerases are potent inhibitors of cellular translation and virus replication. *J Virol* *88*, 2116-2130.
- Augustin, A., Spenlehauer, C., Dumond, H., Menissier-De Murcia, J., Piel, M., Schmit, A.C., Apiou, F., Vonesch, J.L., Kock, M., Bornens, M., *et al.* (2003). PARP-3 localizes preferentially to the daughter centriole and interferes with the G1/S cell cycle progression. *Journal of cell science* *116*, 1551-1562.
- Bae, J., Donigian, J.R., and Hsueh, A.J. (2003). Tankyrase 1 interacts with Mcl-1 proteins and inhibits their regulation of apoptosis. *The Journal of biological chemistry* *278*, 5195-5204.
- Bai, P., and Canto, C. (2012). The role of PARP-1 and PARP-2 enzymes in metabolic regulation and disease. *Cell metabolism* *16*, 290-295.
- Boehler, C., Gauthier, L.R., Mortusewicz, O., Biard, D.S., Saliou, J.M., Bresson, A., Sanglier-Cianferani, S., Smith, S., Schreiber, V., Boussin, F., *et al.* (2011). Poly(ADP-ribose) polymerase 3 (PARP3), a newcomer in cellular response to DNA damage and mitotic progression. *Proceedings of the National Academy of Sciences of the United States of America* *108*, 2783-2788.
- Chang, P., Coughlin, M., and Mitchison, T.J. (2005). Tankyrase-1 polymerization of poly(ADP-ribose) is required for spindle structure and function. *Nat Cell Biol* *7*, 1133-1139.
- Cho, S.H., Ahn, A.K., Bhargava, P., Lee, C.H., Eischen, C.M., McGuinness, O., and Boothby, M. (2011). Glycolytic rate and lymphomagenesis depend on PARP14, an ADP ribosyltransferase of the B aggressive lymphoma (BAL) family. *Proceedings of the National Academy of Sciences of the United States of America* *108*, 15972-15977.
- Chou, H.Y., Chou, H.T., and Lee, S.C. (2006). CDK-dependent activation of poly(ADP-ribose) polymerase member 10 (PARP10). *The Journal of biological chemistry* *281*, 15201-15207.
- Cook, B.D., Dynek, J.N., Chang, W., Shostak, G., and Smith, S. (2002). Role for the related poly(ADP-Ribose) polymerases tankyrase 1 and 2 at human telomeres. *Molecular and cellular biology* *22*, 332-342.
- de Murcia, J.M., Niedergang, C., Trucco, C., Ricoul, M., Dutrillaux, B., Mark, M., Oliver, F.J., Masson, M., Dierich, A., LeMeur, M., *et al.* (1997). Requirement of poly(ADP-ribose) polymerase in recovery from DNA damage in mice and in cells. *Proceedings of the National Academy of Sciences of the United States of America* *94*, 7303-7307.
- Di Paola, S., Micaroni, M., Di Tullio, G., Buccione, R., and Di Girolamo, M. (2012). PARP16/ARTD15 is a novel endoplasmic-reticulum-associated mono-ADP-ribosyltransferase that interacts with, and modifies karyopherin-ss1. *PloS one* *7*, e37352.
- Goenka, S., and Boothby, M. (2006). Selective potentiation of Stat-dependent gene expression by collaborator of Stat6 (CoaSt6), a transcriptional cofactor. *Proceedings of the National Academy of Sciences of the United States of America* *103*, 4210-4215.
- Hayakawa, S., Shiratori, S., Yamato, H., Kameyama, T., Kitatsuji, C., Kashigi, F., Goto, S., Kameoka, S., Fujikura, D., Yamada, T., *et al.* (2011). ZAPS is a potent stimulator of signaling mediated by the RNA helicase RIG-I during antiviral responses. *Nature immunology* *12*, 37-44.
- Herzog, N., Hartkamp, J.D., Verheugd, P., Treude, F., Forst, A.H., Feijs, K.L., Lippok, B.E., Kremmer, E., Kleine, H., and Luscher, B. (2013). Caspase-dependent cleavage of the mono-ADP-ribosyltransferase ARTD10 interferes with its pro-apoptotic function. *FEBS J* *280*, 1330-1343.
- Hong, S.J., Dawson, T.M., and Dawson, V.L. (2004). Nuclear and mitochondrial conversations in cell death: PARP-1 and AIF signaling. *Trends in pharmacological sciences* *25*, 259-264.

- Huang, S.M., Mishina, Y.M., Liu, S., Cheung, A., Stegmeier, F., Michaud, G.A., Charlat, O., Wiелlette, E., Zhang, Y., Wiessner, S., *et al.* (2009). Tankyrase inhibition stabilizes axin and antagonizes Wnt signalling. *Nature* *461*, 614-620.
- Iqbal, M.B., Johns, M., Cao, J., Liu, Y., Yu, S.C., Hyde, G.D., Laffan, M.A., Marchese, F.P., Cho, S.H., Clark, A.R., *et al.* (2014). PARP-14 combines with tristetraprolin in the selective posttranscriptional control of macrophage tissue factor expression. *Blood* *124*, 3646-3655.
- Juszczynski, P., Kutok, J.L., Li, C., Mitra, J., Aguiar, R.C., and Shipp, M.A. (2006). BAL1 and BBAP are regulated by a gamma interferon-responsive bidirectional promoter and are overexpressed in diffuse large B-cell lymphomas with a prominent inflammatory infiltrate. *Molecular and cellular biology* *26*, 5348-5359.
- Jwa, M., and Chang, P. (2012). PARP16 is a tail-anchored endoplasmic reticulum protein required for the PERK- and IRE1alpha-mediated unfolded protein response. *Nature cell biology* *14*, 1223-1230.
- Kaminker, P.G., Kim, S.H., Taylor, R.D., Zebarjadian, Y., Funk, W.D., Morin, G.B., Yaswen, P., and Campisi, J. (2001). TANK2, a new TRF1-associated poly(ADP-ribose) polymerase, causes rapid induction of cell death upon overexpression. *The Journal of biological chemistry* *276*, 35891-35899.
- Kickhoefer, V.A., Siva, A.C., Kedersha, N.L., Inman, E.M., Ruland, C., Streuli, M., and Rome, L.H. (1999). The 193-kD vault protein, VPARP, is a novel poly(ADP-ribose) polymerase. *J Cell Biol* *146*, 917-928.
- Kraus, W.L., and Hottiger, M.O. (2013). PARP-1 and gene regulation: progress and puzzles. *Molecular aspects of medicine* *34*, 1109-1123.
- Leung, A.K., Vyas, S., Rood, J.E., Bhutkar, A., Sharp, P.A., and Chang, P. (2011). Poly(ADP-ribose) regulates stress responses and microRNA activity in the cytoplasm. *Mol Cell* *42*, 489-499.
- Li, X., Klaus, J.A., Zhang, J., Xu, Z., Kibler, K.K., Andrabi, S.A., Rao, K., Yang, Z.J., Dawson, T.M., Dawson, V.L., *et al.* (2010). Contributions of poly(ADP-ribose) polymerase-1 and -2 to nuclear translocation of apoptosis-inducing factor and injury from focal cerebral ischemia. *Journal of neurochemistry* *113*, 1012-1022.
- Liang, Y.C., Hsu, C.Y., Yao, Y.L., and Yang, W.M. (2013). PARP-2 regulates cell cycle-related genes through histone deacetylation and methylation independently of poly(ADP-ribosylation). *Biochemical and biophysical research communications* *431*, 58-64.
- MacPherson, L., Tamblyn, L., Rajendra, S., Bralha, F., McPherson, J.P., and Matthews, J. (2013). 2,3,7,8-Tetrachlorodibenzo-p-dioxin poly(ADP-ribose) polymerase (TiPARP, ARTD14) is a mono-ADP-ribosyltransferase and repressor of aryl hydrocarbon receptor transactivation. *Nucleic acids research* *41*, 1604-1621.
- Mehrotra, P., Riley, J.P., Patel, R., Li, F., Voss, L., and Goenka, S. (2011). PARP-14 functions as a transcriptional switch for Stat6-dependent gene activation. *J Biol Chem* *286*, 1767-1776.
- Meyer-Ficca, M.L., Ihara, M., Bader, J.J., Leu, N.A., Beneke, S., and Meyer, R.G. (2015). Spermatid head elongation with normal nuclear shaping requires ADP-ribosyltransferase PARP11 (ARTD11) in mice. *Biol Reprod* *92*, 80.
- Nicolae, C.M., Aho, E.R., Choe, K.N., Constantin, D., Hu, H.J., Lee, D., Myung, K., and Moldovan, G.L. (2015). A novel role for the mono-ADP-ribosyltransferase PARP14/ARTD8 in promoting homologous recombination and protecting against replication stress. *Nucleic Acids Res* *43*, 3143-3153.
- Nicolae, C.M., Aho, E.R., Vlahos, A.H., Choe, K.N., De, S., Karras, G.I., and Moldovan, G.L. (2014). The ADP-ribosyltransferase PARP10/ARTD10 interacts with proliferating cell nuclear antigen (PCNA) and is required for DNA damage tolerance. *The Journal of biological chemistry* *289*, 13627-13637.
- Roper, S.J., Chrysanthou, S., Senner, C.E., Sienerth, A., Gnan, S., Murray, A., Masutani, M., Latos, P., and Hemberger, M. (2014). ADP-ribosyltransferases Parp1 and Parp7 safeguard pluripotency of ES cells. *Nucleic Acids Res* *42*, 8914-8927.
- Rouleau, M., Saxena, V., Rodrigue, A., Paquet, E.R., Gagnon, A., Hendzel, M.J., Masson, J.Y., Ekker, M., and Poirier, G.G. (2011). A key role for poly(ADP-ribose) polymerase 3 in ectodermal specification and neural crest development. *PLoS One* *6*, e15834.
- Saxena, A., Saffery, R., Wong, L.H., Kalitsis, P., and Choo, K.H. (2002). Centromere proteins Cenpa, Cenpb, and Bub3 interact with poly(ADP-ribose) polymerase-1 protein and are poly(ADP-ribosylated). *The Journal of biological chemistry* *277*, 26921-26926.
- Smith, S., Gariat, I., Schmitt, A., and de Lange, T. (1998). Tankyrase, a poly(ADP-ribose) polymerase at human telomeres. *Science* *282*, 1484-1487.
- Szanto, M., Brunyanszki, A., Kiss, B., Nagy, L., Gergely, P., Virag, L., and Bai, P. (2012). Poly(ADP-ribose) polymerase-2: emerging transcriptional roles of a DNA-repair protein. *Cell Mol Life Sci* *69*, 4079-4092.

- Tuncel, H., Tanaka, S., Oka, S., Nakai, S., Fukutomi, R., Okamoto, M., Ota, T., Kaneko, H., Tatsuka, M., and Shimamoto, F. (2012). PARP6, a mono(ADP-ribosyl) transferase and a negative regulator of cell proliferation, is involved in colorectal cancer development. *International journal of oncology* *41*, 2079-2086.
- van Zon, A., Mossink, M.H., Schoester, M., Houtsmuller, A.B., Scheffer, G.L., Scheper, R.J., Sonneveld, P., and Wiemer, E.A. (2003). The formation of vault-tubes: a dynamic interaction between vaults and vault PARP. *Journal of cell science* *116*, 4391-4400.
- Verheugd, P., Forst, A.H., Milke, L., Herzog, N., Feijs, K.L., Kremmer, E., Kleine, H., and Luscher, B. (2013). Regulation of NF-kappaB signalling by the mono-ADP-ribosyltransferase ARTD10. *Nat Commun* *4*, 1683.
- Vyas, S., Chesarone-Cataldo, M., Todorova, T., Huang, Y.H., and Chang, P. (2013). A systematic analysis of the PARP protein family identifies new functions critical for cell physiology. *Nat Commun* *4*, 2240.
- Welsby, I., Hutin, D., Gueydan, C., Kruys, V., Rongvaux, A., and Leo, O. (2014). PARP12, an Interferon-stimulated Gene Involved in the Control of Protein Translation and Inflammation. *The Journal of biological chemistry* *289*, 26642-26657.
- Wyrsh, P., Blenn, C., Bader, J., and Althaus, F.R. (2012). Cell death and autophagy under oxidative stress: roles of poly(ADP-Ribose) polymerases and Ca(2+). *Mol Cell Biol* *32*, 3541-3553.
- Yan, Q., Xu, R., Zhu, L., Cheng, X., Wang, Z., Manis, J., and Shipp, M.A. (2013). BAL1 and its partner E3 ligase, BBAP, link Poly(ADP-ribose) activation, ubiquitylation, and double-strand DNA repair independent of ATM, MDC1, and RNF8. *Mol Cell Biol* *33*, 845-857.
- Yeh, T.Y., Sbodio, J.I., Tsun, Z.Y., Luo, B., and Chi, N.W. (2007). Insulin-stimulated exocytosis of GLUT4 is enhanced by IRAP and its partner tankyrase. *The Biochemical journal* *402*, 279-290.
- Yu, M., Schreek, S., Cerni, C., Schamberger, C., Lesniewicz, K., Poreba, E., Vervoorts, J., Walsemann, G., Grotzinger, J., Kremmer, E., *et al.* (2005). PARP-10, a novel Myc-interacting protein with poly(ADP-ribose) polymerase activity, inhibits transformation. *Oncogene* *24*, 1982-1993.
