# Supplementary material
Source: PubMed Central journal article supplement (PMC4486045)

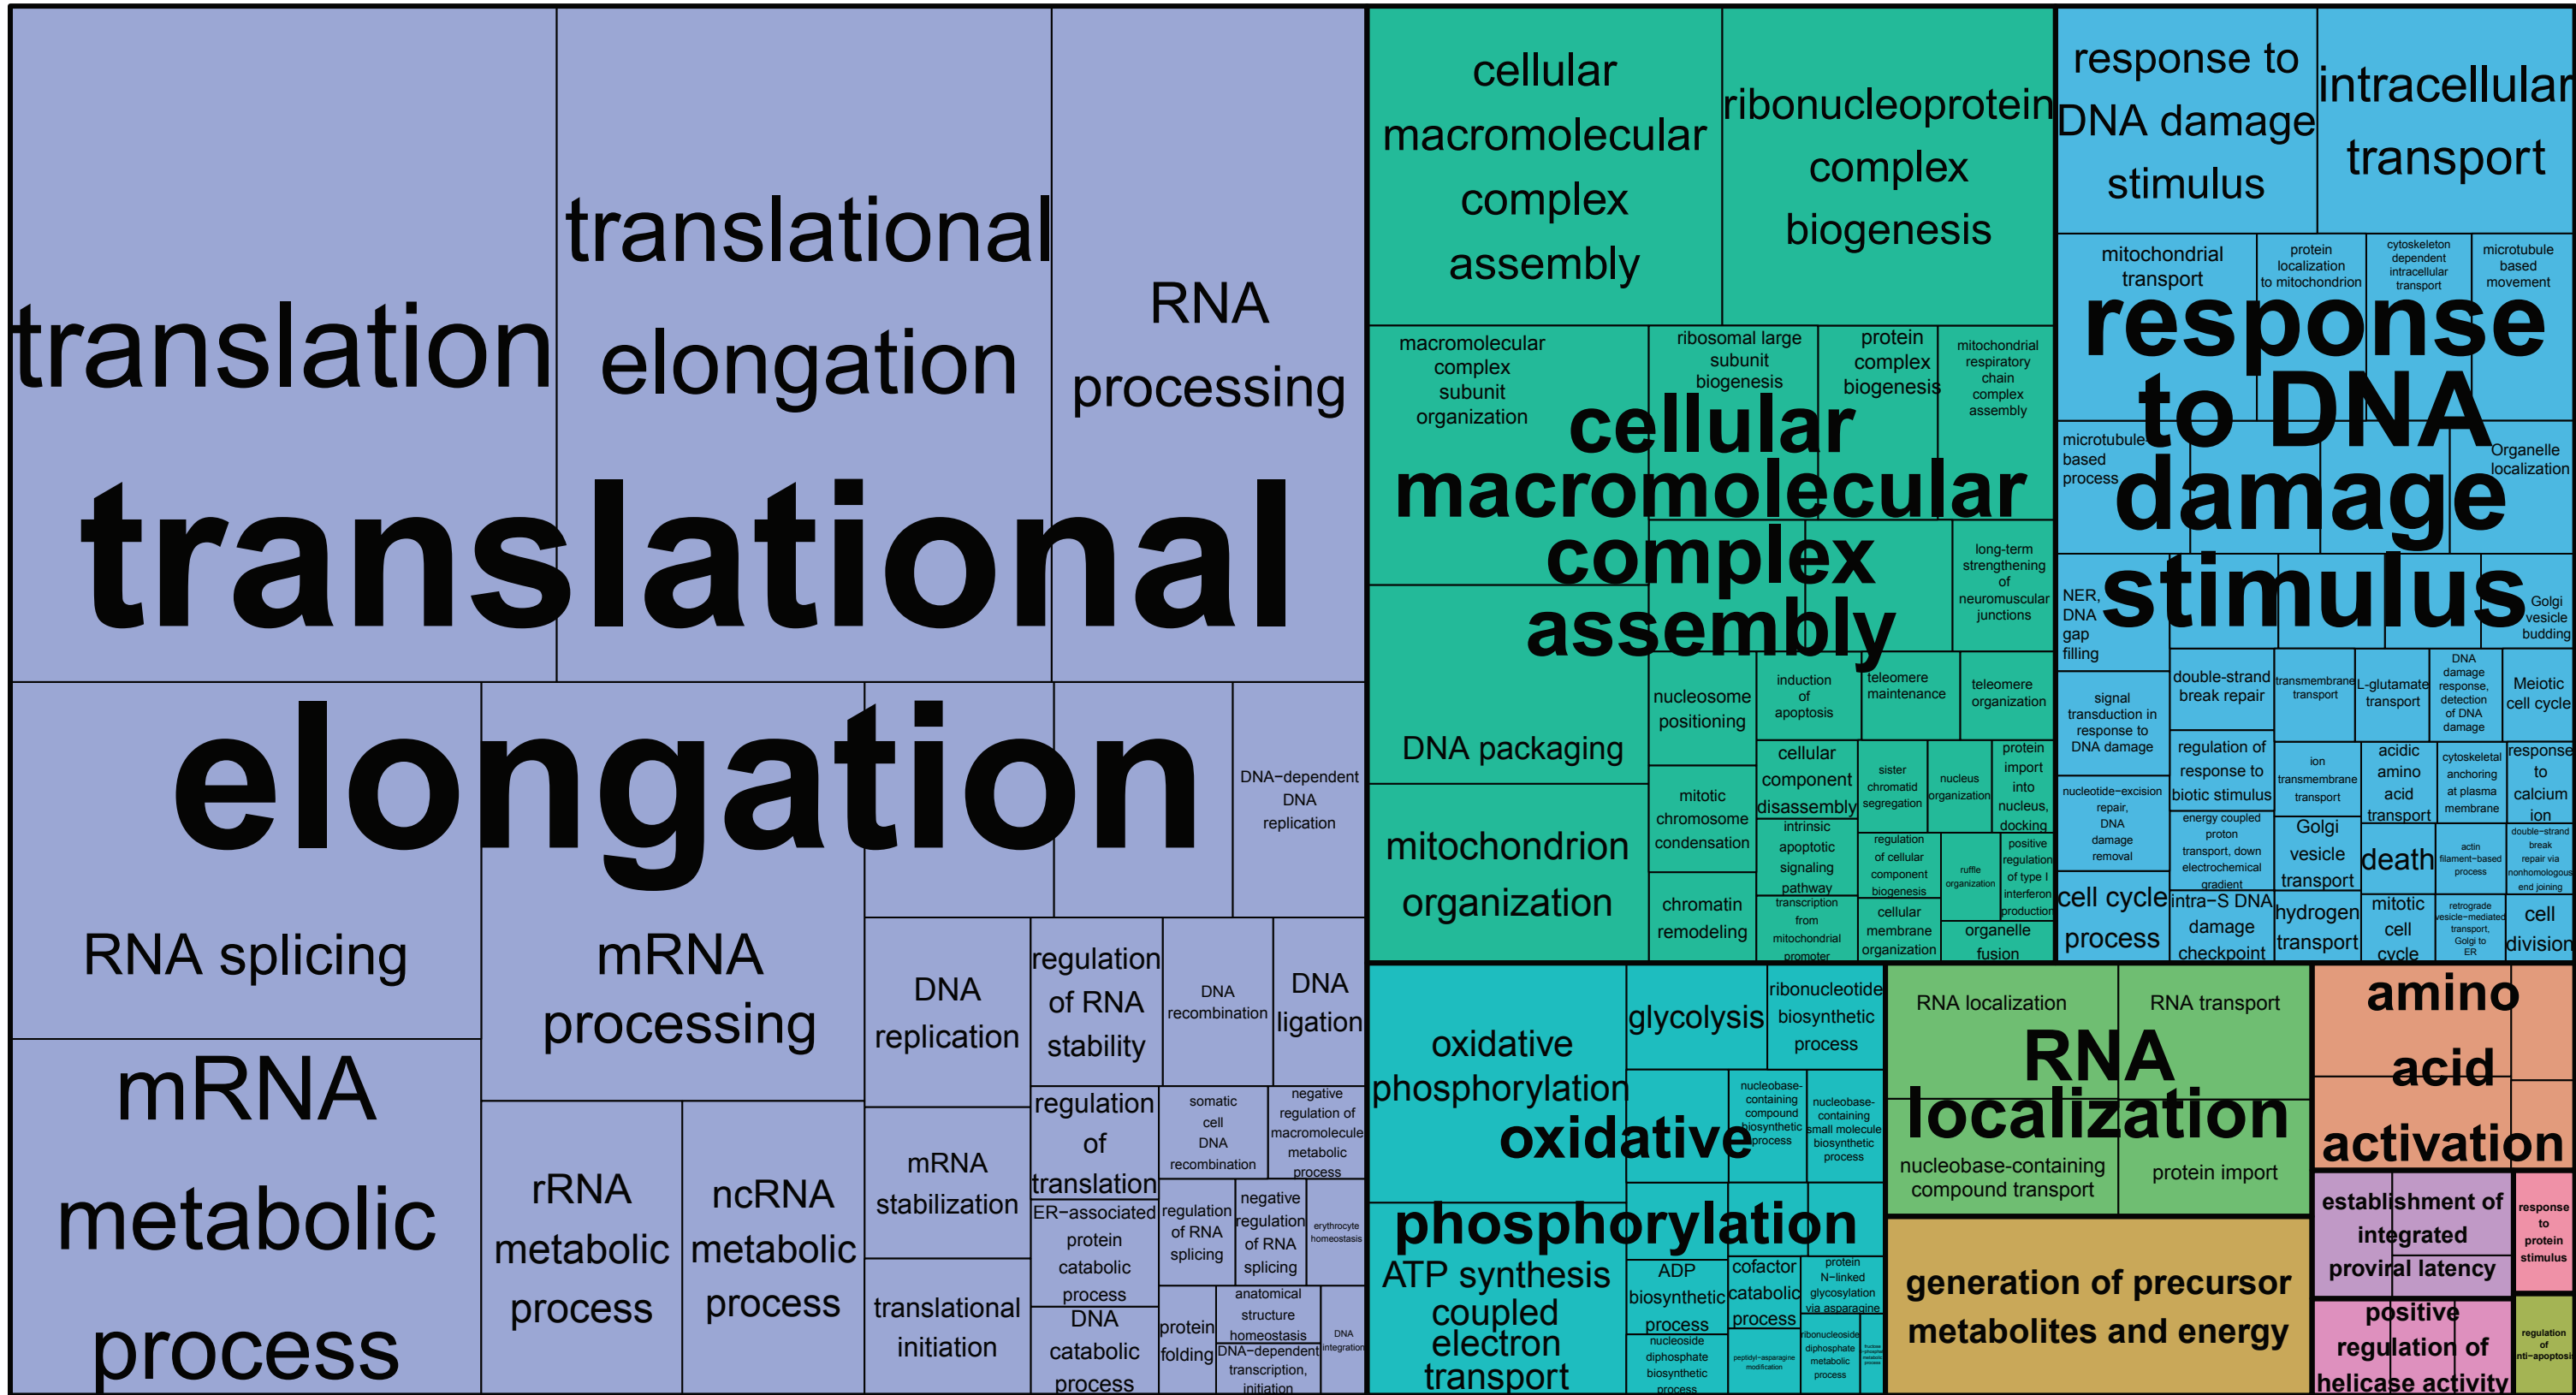

Supplement: NIHMS698699-supplement-2.pdf [file NIHMS698699-supplement-2.pdf]
